# Supplementary material for: AMOTL2 mono-ubiquitination by WWP1 promotes contact inhibition by facilitating LATS activation
Source: Life Sci Alliance. 2021 Aug 17;4(10):e202000953. doi: 10.26508/lsa.202000953 (PMC8372784; doi:10.26508/lsa.202000953)
Supplement: Supplementary file 1 [file LSA-2020-00953_TableS1.xlsx]

## Sheet: page-1_table-1
Table S1. E3 ligase ORF library information.
No.	Class	Gene Symbol	Clone ID		Plate		BsrGI cut	DNA size
1	APC/C	ANAPC11_1	IOH45898	1	A1	0		591
2	Cul3 Complex	TNFAIP1	IOH3751	1	A2	1	402:409	951
3	Cul3 Complex	SPOP	IOH3249	1	A7	0	-	1125
4	RBR	ARIH2	ICH3683	1	A9	0	-	1482
5	Deltex	RNF146	IOH3374	1	A10	0	-	1077
6	Others	CDC34	IOH1870	1	B2	1	440:271	711
7	SCF Complex	FBXO6	IOH1960	1	B3	0	-	882
8	SCF Complex	FBXL3	IOH2236	1	B4	0	-	1287
9	TRIM/RBCC	TRIM9	ICH12704	1	B5	0	-	1653
10	Others	CHFR	IOH12655	1	B6	1	317:1642	1959
11	TRIM/RBCC	MID2	IOH11264	1	B7	0	-	2058
12	SCF Complex	FBXW11	IOH11042	1	B8	0	-	1590
13	SCF Complex	TSPAN17	IOH12586	1	B10	0	-	792
14	SCF Complex	FBX030	IOH10846	1	B11	0	-	2238
15	Others	PAX6	IOH10941	1	B12	0	-	1269
16	Others	RNF11	IOH11235	1	C1	0	-	465
17	Others	RNF208	IOH10314	1	C2	0	-	543
18	Others	RNF113A	IOH10306	1	C3	0	-	1032
19	U-Box	NOSIP	IOH10172	1	C4	0	-	906
20	ECS Complex	SPSB1	IOH10100	1	C6	0	-	822
21	Goliath	RNF167	IOH14407	1	C8	0	-	1053
22	SCF Complex	FBXL18	IOH14000	1	C10	0	-	1098
23	ECS Complex	SOCS2	IOH13865	1	C11	0	-	597
24	SCF Complex	FBXO31	IOH13801	1	C12	1	1007:97	1104
25	U-Box	NOSIP	IOH14367	1	D1	0	-	906
20	Others	RNF111	IOH13610	1	D2	1	166:248	414
27	Others	CGRRF1	IOH14256	1	D3	0	-	999
20	Cul3 Complex	KLHL20	IOH7296	1	D4	0	-	693
29	BRCC Complex	RAD51	IOH4038	1	D11	0	-	729
30	Others	RNF24	IOH3774	1	E2	0	-	447
31	Others	CCNB1IP1	IDH3409	1	E3	0	-	834
32	Oncogenes & Tumor Suppressor Genes	CDC20	IOH3839	1	E4	0	-	1500
33	SCF Complex	RBX1	IOH4015	1	E5	0	-	327
34	SCF Complex	SKP2	IOH6114	1	E6	2	546:273:414	1233
35	Multi-Subunit RING-Finger Cullins & Adaptors	RNF7	IOH7569	1	E8	0	-	342
36	Others	RNF175	IOH22640	1	E9	1	122:865	987
37	ECS Complex	CISH	IOH22653	1	E10	1	615:162	777
38	Muti-Subunit RING-Finger Cullins & Adaptors	TCEB2	IOH14150	1	E11	1	131:226	357
39	Makorin	MKRN1	IOH14075	1	E12	0	-	1449
40	Multi-Subunit RING-Finger Cullins & Adaptors	TCEB1	IOH21468	1	F1	0	-	339
41	HECT	HECTD3	IOH14594	1	F2	0	-	633
42	Mindbomb	MIB1	IOH12998	1	F3	0	-	1188
43	ECV Complex	FEM1B	IOH13134	1	F4	0	-	1884
44	Cul3 Complex	ENC1	IOH3669	1	F7	1	1025:745	1770
45	TRIM/RBCC	TRIM31	IOH10396	1	F8	0	-	345
46	TRIM/RBCC	TRIM74	IOH21866	1	F9	0	-	750
47	Others	RBBP6	IOH23148	1	F10	0	-	357
48	SCF Complex	FBXL5	IOH22444	1	F11	2	234:1420:422	2076
49	TRAF	TRAF2	IOH21846	1	G1	0	-	1506
50	U-Box	WDSUB1	IOH22574	1	G2	0	-	1155
51	Others	MNAT1	IOH3100	1	G3	0	-	930
52	Others	RNF38	IOH21788	1	G4	0	-	1299
53	Others	BFAR	IOH4880	1	G5	0	-	1353
54	TRIM/RBCC	TRIM52	IOH7015	1	G6	0	-	894
55	TRIM/RBCC	TRIM41	IOH14113	1	G7	0	-	633
56	ECS Complex	ASB9	IOH11965	1	G8	0	-	885
57	ECS Complex	ASB9	IOH3256	1	G9	0	-	759
58	Others	RNF6	IOH22143	1	G10	0	-	2058
59	ECS Complex	SPSB2	IOH4981	1	G11	0	-	792
60	HECT	WWP2	IOH4735	1	G12	0	-	1008
61	Oncogenes & Tumor Suppressor Genes	CBLC	IOH22198	1	H1	0	-	1425
62	PDZRN	LNX1	IOH22717	1	H2	0	-	1899
63	TRIM/RBCC	TRIM44	IOH12577	1	H3	0	-	1035
64	Others	RNF10	IOH9787	1	H4	0	-	2436
65	Others	RSPRY1	IOH11125	1	H5	0	-	1731
66	UBL	PIAS2	IOH13849	1	H6	2	1084:237:398	1719
67	TRIM/RBCC	TRIM23	IOH10672	1	H7	0	-	1725
68	Others	RNF12	IOH14364	1	H8	1	1259:616	1875
69	Goliath	RNF13	IOH13838	1	H9	1	681:465	1146
70	HECT	UBE3C	IOH 14050	1	H10	0	-	1950
71	Cul4 Complex	DDB2	IOH4740	1	H12	0	-	1284
72	TRIM/RBCC	RFPL3	IOH21504	2	A3	0	-	867
73	SCF Complex	FBXO4	IOH26750	2	A4	1	195:969	1164
74	Polycomb	PCGF5	IOH27011	2	A5	0	-	771
75	SCF Complex	FBXO25	IOH26678	2	A7	0	-	1104
76	ECS Complex	SOCS5	IOH27139	2	A8	1	480:1131	1611
77	Others	RNF168	IOH27564	2	A9	1	729:987	1716
78	Others	RNF103	IOH27682	2	A11	0	-	2058
79	HECT	UBE3A	IOH22932	2	A12	2	632:388:738	1758
80	Others	SYVN1	IOH21699	2	B1	3	137:492:48:1177	1854
81	SCF Complex	FBXW5	IOH3242	2	B3	0	-	480
82	Others	FANCL	IOH28882	2	B4	0	-	1128
83	ECS Complex	SOCS4	IOH29165	2	B5	1	1198:125	1323
84	VPS	VPS18	IOH13196	2	B6	0	-	1743
85	SCF Complex	FBXO21	IOH28769	2	B7	0	-	1434
86	ECS Complex	SOCS6	IOH11861	2	B8	0	-	1608
87	Others	ZER1	IOH29391	2	B9	1	415:1886	2301
88	TRIM/RBCC	TRIM27	IOH9973	2	B10	0	-	1542
89	SCF Complex	FBXL4	IOH29000	2	B11	1	417:1449	1866
00	Others	RNF111	IOH29135	2	B12	2	2061:649:248	2958
91	Others	RNF26	IOH6846	2	C1	0	-	1302
92	ECS Complex	SOCS3	IOH29563	2	C2	0	-	678
93	Oncogenes & Tumor Suppressor Genes	SIAH1	IOH27353	2	C4	0	-	942
94	VPS	VPS41	IOH27643	2	C5	1	1550:1015	2565
95	CBL	CBLB	IOH27168	2	C6	0	-	2949
06	Others	TRAIP	IOH3484	2	C7	0	-	1410
97	Cul3 Complex	RHOBTB1	IOH27118	2	C8	0	-	2091
98	Cul3 Complex	RHOBTB3	IOH25836	2	C9	2	427:1006:403	1836
99	HECT	UBE3C	IOH12763	2	C10	1	1205:10	1215
100	Pellino	PELI1	IOH26519	2	C11	1	939:318	1257
101	VPS	VPS11	ICH14648	2	C12	0	-	996
102	SCF Complex	FBXL2	IOH27349	2	D1	0	-	1272
103	Others	RNF41	IOH21937	2	D2	0	-	954
104	Cul4 Complex	CRBN	IOH23076	2	D3	1	381:948	1329
105	SCF Complex	FBXL14	IOH11609	2	D4	0	-	1257
106	Cul3 Complex	BTBD1	IOH21551	2	D5	0	-	1449
107	ECS Complex	ASB2	ICH21720	2	D6	0	-	1764
108	Others	RNF170	IOH21681	2	D7	2	141:340:122	603
109	TRIM/RBCC	TRIM26	IOH21638	2	D9	1	1019:601	1620
110	TRIM/RBCC	TRIM17	IOH21790	2	D10	0	-	1434
111	TRIM/RBCC	TRIM4	IOH14619	2	D11	0	-	885
113	Others	RNF5	IOH3743	2	E5	0	-	543
114	Cul3 Complex	KLHL2	IOH22387	2	E7	1	375:1407	1782
115	HECT	UBE3A	IOH4120	2	E9	2	1493:388:738	2619
116	TRIM/RBCC	TRIM28	IOH5106	2	E11	0	-	2508
117	ECS Complex	SPSB4	IOH6956	2	F2	0	-	822
118	TRAF	TRAF7	IOH13225	2	F3	1	1370:415	1785
119	TRIM/RBCC	TRIM8	IOH13368	2	F5	1	632:1024	1656
120	TRIM/RBCC	RNF135	IOH6611	2	F6	0	-	633
121	SCF Complex	FBXO33	IOH28939	2	F7	0	-	1668
122	ECV Complex	CUL2	IOH13931	2	F8	2	1608:70:560	2238
123	UBL	PIAS3	IOH4782	2	F9	0	-	1860
124	TRIM/RBCC	TRIM31	IOH10357	2	F10	1	489:789	1278
125	Praja	RNF126	IOH14599	2	F11	0	-	936
126	ECS Complex	ASB1	IOH12417	2	F12	1	587:421	1008
127	SCF Complex	FBXO7	IOH7010	2	G1	1	1184:385	1569
128	SCF Complex	FBXO3	IOH26934	2	G2	1	894:522	1416
129	TRAC-I	RNF125	IOH10818	2	G3	0	-	699
130	UBR Box	UBR2	IOH40668	2	G4	1	754:566	1320
131	SCF Complex	FBXL20	IOH40622	2	G5	2	379:78:854	1311
132	TRAC-I	RNF166	IOH14416	2	G8	0	-	714
133	MDM	MDM4	IOH40040	2	G9	0	-	1473
134	Goliath	RNF128	IOH39866	2	G10	0	-	1287
135	Deltex	DTX2	IOH25783	2	G11	1	35:1834	1869
136	SCF Complex	FBXW4	IOH39881	2	G12	1	392:847	1239
137	UBL	PIAS1	IOH38116	2	H1	1	1195:761	1956
138	HECT	SMURF1	IOH38225	2	H2	0	-	2196
139	TRIM/RBCC	TRIM11	IOH40773	2	H3	0	-	1407
140	ECS Complex	SOCS5	IOH37917	2	H4	1	480:1131	1611
141	Others	WHSC1	IOH38113	2	H5	0	-	1944
142	SCF Complex	FBXO4	IOH42196	2	H6	2	195:717:12	924
143	Oncogenes & Tumor Suppressor Genes	SIAH1	IOH27546	2	H7	0	-	849
144	SCF Complex	FBXO11	IOH44015	2	H8	2	895:1548:89	2532
145	SCF Complex	FBXO21	IOH42260	2	H9	0	-	1866
146	Others	RNF152	IOH43310	2	H10	0	-	612
147	ECV Complex	VHL	IOH43352	2	H11	0	-	519
148	ECS Complex	WSB1	IOH43473	2	H12	1	650:85	735
149	Others	PAX6	IOH42347	3	A1	0	-	1311
150	Oncogenes & Tumor Suppressor Genes	BIRC7	IOH44697	3	A4	0	-	897
151	BRCC Complex	RAD51	IOH41191	3	A5	1	473:547	1020
152	Multi-Subunit RING-Finger Cullins & Adaptors	TCEB2	IOH42170	3	A8	1	131:355	486
153	Others	RNF34	IOH41584	3	A9	0	-	1122
154	Others	RNF41	IOH45538	3	A10	0	-	741
155	SCF Complex	SKP2	IOH41200	3	A11	2	546:273:456	1275
156	SCF Complex	FBXO25	IOH45912	3	A12	0	-	876
157	Cul3 Complex	KLHL20	IOH45628	3	B1	0	-	1830
158	TRIM/RBCC	TRIM63	IOH45956	3	B2	0	-	1062
159	SCF Complex	TSPAN17	IOH45925	3	B3	0	-	990
160	Oncogenes & Tumor Suppressor Genes	MDM2	IOH45927	3	B4	1	414:1062	1476
161	TRIM/RBCC	MID1	IOH45487	3	B5	0	-	1659
162	TRIM/RBCC	TRIM24	IOH45510	3	B6	3	487:1547:1062:57	3153
163	ECS Complex	ASB3	IOH45865	3	B7	0	-	1338
164	Goliath	RNF13	IOH45765	3	B8	1	78:465	543
165	Multi-Subunit RING-Finger Cullins & Adaptors	CUL4A	IOH45878	3	B9	0	-	2280
166	SCF Complex	FBXO9	IOH45897	3	B10	3	458:535:155:64	1212
167	APC/C	ANAPC11	IOH45898	3	B11	0	-	591
168	Cul3 Complex	KLHL9	IOH42536	3	B12	2	1465:303:86	1854
169	Others	WHSC1	IOH42549	3	C1	0	-	1755
170	SCF Complex	CUL1	IOH41991	3	C2	4	92:520:486:553:680	2331
171	Others	RNF121	IOH42461	3	C3	0	-	888
172	BRE1	RNF208	IOH42829	3	C4	0	-	2928
173	Polycomb	PCGF3	IOH41174	3	C5	0	-	729
174	SCF Complex	FBXO32	IOH41318	3	C6	1	532:536	1068
175	Others	RNF4	IOH41414	3	C7	0	-	573
176	TRIM/RBCC	TRIM61	IOH43094	3	C8	0	-	489
177	TRIM/RBCC	TRIM72	IOH23256	3	C9	0	-	810
178	HECT	WWP1	IOH27251	3	D3	0	-	2769
179	Oncogenes & Tumor Suppressor Genes	MDM2	IOH50109	3	D5	0	-	213
180	Multi-Subunit RING-Finger Cullins & Adaptors	RNF7	IOH50165	3	D6	0	-	273
181	BRE1	RNF40	IOH6599	3	D7	2	638:1386:982	3006
182	Others	MALT1	IOH23001	3	D8	1	1290:1152	2442
183	TRIM/RBCC	TRIM36	IOH57334	3	D9	0	-	186
184	TRIM/RBCC	TRIM36	IOH57333	3	D10	0	-	183
185	Oncogenes & Tumor Suppressor Genes	SIAH2	IOH10260	3	D11	0	-	975
186	TRIM/RBCC	TRIM25	IOH11168	3	E1	1	626:1267	1893
187	HECT	HERC3	IOH26165	3	E2	0	-	1107
188	Cul3 Complex	GAN	IOH25725	3	E3	1	1127:667	1794
189	Praja	RNF126	IOH4042	3	E4	0	-	981
190	Deltex	DTX1	IOH28067	3	E6	0	-	1863
191	Polycomb	PCGF3	IOH11623	3	E7	0	-	291
192	Praja	PJA2	IOH22232	3	E8	0	-	2127
193	TRAF	TRAF5	IOH21612	3	E9	0	-	1674
194	Others	DCST1	IOH40518	3	E10	1	248:1747	1995
195	APC/C	ANAPC2	IOH21911	3	E11	0	-	2469
196	SCF Complex	FBXL18	IOH9877	3	E12	1	402:378	780
197	TRIM/RBCC	TRIM61	IOH53777	3	F1	0	-	630
198	ECV Complex	VHL	IOH29460	3	F2	0	-	519
199	SCF Complex	FBXO9	IOH57881	3	F3	3	560:535:155:64	1314
200	Others	RNF121	IOH57484	3	F4	0	-	984
201	Oncogenes & Tumor Suppressor Genes	CBL	IOH46781	3	F5	1	1699:1022	2721
202	TRAF	TRAF3	IOH29783	3	F6	1	262:1445	1707
203	Goliath	RNF128	IOH39395	3	F7	1	298:911	1209
204	TRAF	TRAF4	IOH29740	3	F8	1	1094:319	1413
205	RBR	RNF14	IOH46388	3	F9	0	-	1047
206	ZNRF	ZNRF1	IOH6798	3	F10	0	-	684
207	Others	CGRRF1	IOH53926	3	F12	0	-	999
208	Others	RNF8	IOH56905	3	G1	0	-	1458
209	Deltex	DTX2	IOH57012	3	G2	1	35:1834	1869
210	U-Box	STUB1	IOH56981	3	G4	0	-	912
211	SCF Complex	FBXL12	IOH57088	3	G5	0	-	981
212	Others	UBB	IOH56688	3	G7	0	-	690
213	Others	LRSAM1	IOH55653	3	G8	0	-	2172
214	Oncogenes & Tumor Suppressor Genes	MDM2	IOH58601	3	G9	0	-	318
215	HECT	HERC3	IOH53090	3	H5	0	-	3153
216	ECS Complex	ASB9	IOH59409	3	H6	0	-	789
217	TRIM/RBCC	TRIM27	IOH61477	3	H9	0	-	1542
218	SCF Complex	FBXW12	IOH63570	3	H10	1	1151:187	1338
219	SCF Complex	FBXW12	IOH63567	3	H11	0	-	789
220	SCF Complex	FBXW12	IOH63568	3	H12	1	998:187	1185
221	TRAC-I	RNF114	IOH10466	4	A5	0	-	687
222	Praja	RNF115	IOH29102	4	A6	0	-	915
223	Polycomb	RNF2	IOH12266	4	A8	0	-	1011
224	RBR	RNF216	IOH45500	4	A10	0	-	1467
225	Others	MARCH5	IOH9985	4	A11	0	-	837
226	Others	RNF25	RNF25	4	B1	0	-	1380
227	HECT	HECTD2	HECTD2	4	B2	0	-	624
