# Supplementary material for: AMOTL2 mono-ubiquitination by WWP1 promotes contact inhibition by facilitating LATS activation
Source: Life Sci Alliance. 2021 Aug 17;4(10):e202000953. doi: 10.26508/lsa.202000953 (PMC8372784; doi:10.26508/lsa.202000953)
Supplement: Supplementary file 2 [file LSA-2020-00953_TableS2.xlsx]

## Sheet: Sheet1
Summary of screening results from all E3 ligases from the ORF library
Class	Gene Symbol	Clone ID	Ubiquitination activity (arbitrary) [positive effect: "+", no effect: "-", not expressed: ".", no colonies: "*"]
APC/C	ANAPC11_1	IOH45898	.
Cul3 Complex	TNFAIP1	IOH3751	-
Cul3 Complex	SPOP	IOH3249	-
RBR	ARIH2	IOH3683	-
Deltex	RNF146	IOH3374	-
Others	CDC34	IOH1870	.
SCF Complex	FBXO6	IOH1960	-
SCF Complex	FBXL3	IOH2236	-
TRIM/RBCC	TRIM9	IOH12704	+
Others	CHFR	IOH12655	-
TRIM/RBCC	MID2	IOH11264	-
SCF Complex	FBXW11	IOH11042	-
SCF Complex	TSPAN17	IOH12586	-
SCF Complex	FBXO30	IOH10846	-
Others	PAX6	IOH10941	.
Others	RNF11	IOH11235	-
Others	RNF208	IOH10314	-
Others	RNF113A	IOH10306	-
U-Box	NOSIP	IOH10172	-
ECS Complex	SPSB1	IOH10110	-
Goliath	RNF167	IOH14407	.
SCF Complex	FBXL18	IOH14000	+
ECS Complex	SOCS2	IOH13865	-
SCF Complex	FBXO31	IOH13801	-
U-Box	NOSIP	IOH14367	-
Others	RNF111	IOH13610	.
Others	CGRRF1	IOH14256	-
Cul3 Complex	KLHL20	IOH7296	-
BRCC Complex	RAD51	IOH4038	.
Others	RNF24	IOH3774	-
Others	CCNB1IP1	IOH3409	-
Oncogenes&Tumor Supressor Genes	CDC20	IOH3839	-
SCF Complex	RBX1	IOH4015	-
SCF Complex	SKP2	IOH6114	.
Multi-Subunit RING-Finger Culins&Adaptors	RNF7	IOH7569	-
Others	RNF175	IOH22640	.
ECS Complex	CISH	IOH22653	-
Multi-Subunit RING-Finger Culins&Adaptors	TCEB2	IOH14150	-
Makorin	MKRN1	IOH14075	-
Multi-Subunit RING-Finger Culins&Adaptors	TCEB1	IOH21468	-
HECT	HECTD3	IOH14594	-
Mindbomb	MIB1	IOH12998	-
ECV complex	FEM1B	IOH13134	.
Cul3 Complex	ENC1	IOH3669	-
TRIM/RBCC	TRIM31	IOH10396	-
TRIM/RBCC	TRIM74	IOH21866	-
Others	RBBP6	IOH23148	.
SCF Complex	FBXL5	IOH22444	-
TRAF	TRAF2	IOH21846	-
U-Box	WDSUB1	IOH22574	+
Others	MNAT1	IOH3100	.
Others	RNF38	IOH21788	.
Others	BFAR	IOH4880	.
TRIM/RBCC	TRIM52	IOH7015	-
TRIM/RBCC	TRIM41	IOH14113	-
ECS Complex	ASB9	IOH11965	-
ECS Complex	ASB9	IOH3256	-
Others	RNF6	IOH22143	.
ECS Complex	SPSB2	IOH4981	-
HECT	WWP2	IOH4735	-
Oncogenes&Tumor Supressor Genes	CBLC	IOH22918	-
PDZRN	LNX1	IOH22717	-
TRIM/RBCC	TRIM44	IOH12577	-
Others	RNF10	IOH9787	-
Others	RSPPY1	IOH11125	.
UBL	PIAS2	IOH13849	-
TRIM/RBCC	TRIM23	IOH10672	.
Others	RNF12	IOH14364	.
Goliath	RNF13	IOH13838	.
HECT	UBE3C	IOH14050	-
Cul4 Complex	DDB2	IOH4740	-
TRIM/RBCC	RFPL3	IOH21504	-
SCF Complex	FBXO4	IOH26750	-
Polycomb	PCGF5	IOH27011	-
SCF Complex	FBXO25	IOH26678	-
ECS Complex	SOCS5	IOH27139	*
Others	RNF168	IOH27564	-
Others	RNF103	IOH27682	.
HECT	UBE3A	IOH22932	.
Others	SYVN1	IOH21699	-
SCF Complex	FBXW5	IOH3242	-
Others	FANCL	IOH28882	.
ECS Complex	SOCS4	IOH29165	.
VPS	VPS18	IOH13196	-
SCF Complex	FBXO21	IOH28769	-
ECS Complex	SOCS6	IOH11861	-
Others	ZER1	IOH29391	-
TRIM/RBCC	TRIM27	IOH9973	.
SCF Complex	FBXL4	IOH29000	+
Others	RNF111	IOH29135	.
Others	RNF26	IOH6846	-
ECS Complex	SOCS3	IOH29563	-
Oncogenes&Tumor Supressor Genes	SIAH1	IOH27353	.
VPS	VPS41	IOH27643	-
CBL	CBLB	IOH27168	+
Others	TRAIP	IOH3484	+
Cul3 Complex	RHOBTB1	IOH27118	-
Cul3 Complex	RHOBTB3	IOH25836	-
HECT	UBE3C	IOH12763	-
Pelino	PELI1	IOH26519	+
VPS	VPS11	IOH14648	.
SCF Complex	FBXL2	IOH27349	+
Others	RNF41	IOH21937	+
Cul4 Complex	CRBN	IOH23076	+
SCF Complex	FBXL14	IOH11609	-
Cul3 Complex	BTBD1	IOH21551	-
ECS Complex	ASB2	IOH21720	-
Others	RNF170	IOH21681	-
TRIM/RBCC	TRIM26	IOH21638	-
TRIM/RBCC	TRIM17	IOH21790	-
TRIM/RBCC	TRIM4	IOH14619	-
Others	RNF5	IOH3743	-
Cul3 Complex	KLHL2	IOH22387	.
HECT	UBE3A	IOH4120	.
TRIM/RBCC	TRIM28	IOH5106	+
ECS Complex	SPSB4	IOH6956	-
TRAF	TRAF7	IOH13225	.
TRIM/RBCC	TRIM8	IOH13368	-
TRIM/RBCC	RNF135	IOH6611	-
SCF Complex	FBXO33	IOH28939	-
ECV complex	CUL2	IOH13931	-
UBL	PIAS3	IOH4782	-
TRIM/RBCC	TRIM31	IOH10357	.
Praja	RNF126	IOH14599	-
ECS Complex	ASB1	IOH12417	.
SCF Complex	FBXO7	IOH12417	-
SCF Complex	FBXO3	IOH26934	-
TRAC-I	RNF125	IOH10818	.
UBR Box	UBR2	IOH40668	+
SCF Complex	FBXL20	IOH40622	+
TRAC-I	RNF166	IOH14416	-
MDM	MDM4	IOH40040	-
Goliath	RNF128	IOH39866	.
Deltex	DTX2	IOH25783	-
SCF Complex	FBXW4	IOH39881	.
UBL	PIAS1	IOH38116	-
HECT	SMURF1	IOH38225	.
TRIM/RBCC	TRIM11	IOH40773	.
ECS Complex	SOCS5	IOH37917	.
Others	WHSC1	IOH38113	+
SCF Complex	FBXO4	IOH42196	+
Oncogenes&Tumor Supressor Genes	SIAH1	IOH27546	.
SCF Complex	FBXO11	IOH44015	.
SCF Complex	FBXO21	IOH42260	+
Others	RNF152	IOH43310	-
ECV Complex	VHL	IOH43352	+
ECS Complex	WSB1	IOH43473	.
Others	PAX6	IOH42347	.
Oncogenes&Tumor Supressor Genes	BIRC7	IOH44697	+
BRCC Complex	RAD51	IOH41191	+
Multi-Subunit RING-Finger Culins&Adaptors	TCEB2	IOH42170	+
Others	RNF34	IOH41584	-
Others	RNF41	IOH45538	.
SCF Complex	SKP2	IOH41200	.
SCF Complex	FBXO25	IOH45912	-
Cul3 Complex	KLHL20	IOH45628	.
TRIM/RBCC	TRIM63	IOH45956	-
SCF Complex	TSPAN17	IOH45925	-
Oncogenes&Tumor Supressor Genes	MDM2	IOH45972	.
TRIM/RBCC	MID1	IOH45487	-
TRIM/RBCC	TRIM24	IOH45510	.
ECS Complex	ASB3	IOH45865	-
Goliath	RNF13	IOH45765	-
Multi-Subunit RING-Finger Culins&Adaptors	CUL4A	IOH45878	.
SCF Complex	FBXO9	IOH45897	-
APC/C	ANAPC11	IOH45898	-
Cul3 Complex	KLHL9	IOH42535	+
Others	WHSC1	IOH42549	.
SCF Complex	CUL1	IOH41991	-
Others	RNF121	IOH42461	.
BRE1	RNF20	IOH42829	-
Polycomb	PCGF3	IOH41174	.
SCF Complex	FBXO32	IOH41318	-
Others	RNF4	IOH41414	.
TRIM/RBCC	TRIM61	IOH43094	-
TRIM/RBCC	TRIM72	IOH23256	-
HECT	WWP1	IOH27251	++
Oncogenes&Tumor Supressor Genes	MDM2	IOH50109	-
Multi-Subunit RING-Finger Culins&Adaptors	RNF7	IOH50165	-
BRE1	RNF40	IOH6599	-
Others	MALT1	IOH23001	-
TRIM/RBCC	TRIM36	IOH57334	-
TRIM/RBCC	TRIM36	IOH57333	+
Oncogenes&Tumor Supressor Genes	SIAH2	IOH10260	.
TRIM/RBCC	TRIM25	IOH11168	.
HECT	HERC3	IOH27251	-
Cul3 Complex	GAN	IOH25725	-
Praja	RNF126	IOH4042	-
Deltex	DTX1	IOH28067	-
Polycomb	PCGF3	IOH11623	-
Praja	PJA2	IOH22232	-
TRAF	TRAF5	IOH21612	-
Others	DCST1	IOH40518	.
APC/C	ANAPC2	IOH21911	-
SCF Complex	FBXL18	IOH9877	+
TRIM/RBCC	TRIM61	IOH53777	-
ECV complex	VHL	IOH29460	-
SCF Complex	FBXO9	IOH57881	+
Others	RNF121	IOH57484	-
Oncogenes&Tumor Supressor Genes	CBL	IOH46781	.
TRAF	TRAF3	IOH29740	.
Goliath	RNF128	IOH39395	.
TRAF	TRAF4	IOH29740	-
RBR	RNF14	IOH46388	+
ZNRF	ZNRF1	IOH6798	.
Others	CGRRF1	IOH53926	-
Others	RNF8	IOH56905	-
Deltex	DTX2	IOH57012	-
U-Box	STUB1	IOH56981	++
SCF Complex	FBXL12	IOH57088	.
Others	UBB	IOH56688	.
Others	LRSAM1	IOH55653	+
Oncogenes&Tumor Supressor Genes	MDM2	IOH58601	.
HECT	HERC3	IOH53090	.
ECS Complex	ASB9	IOH59409	-
TRIM/RBCC	TRIM27	IOH61477	-
SCF Complex	FBXW12	IOH63570	-
SCF Complex	FBXW12	IOH63567	.
SCF Complex	FBXW12	IOH63568	.
TRAC-I	RNF114	IOH10466	+
Praja	RNF115	IOH	-
Polycomb	RNF2	IOH12266	-
RBR	RNF216	IOH45500	-
Others	MARCH5.	IOH9985	.
Others	RNF25	RNF25	-
HECT	HECTD2	HECTD2	-

## Sheet: Sheet2
Table S2. Summary of E3 ligase ORF library screening on the capacity to ubiquitinate AMOTL2.
Abridged list from Sheet 1 excluding duplicate / not-expressed genes
Class	Gene Symbol	Clone ID	Ubiquitination activity
Cul3 Complex	TNFAIP1	IOH3751	-
Cul3 Complex	SPOP	IOH3249	-
RBR	ARIH2	IOH3683	-
Deltex	RNF146	IOH3374	-
SCF Complex	FBXO6	IOH1960	-
SCF Complex	FBXL3	IOH2236	-
TRIM/RBCC	TRIM9	IOH12704	+
Others	CHFR	IOH12655	-
TRIM/RBCC	MID2	IOH11264	-
SCF Complex	FBXW11	IOH11042	-
SCF Complex	TSPAN17	IOH12586	-
SCF Complex	FBXO30	IOH10846	-
Others	RNF11	IOH11235	-
Others	RNF208	IOH10314	-
Others	RNF113A	IOH10306	-
U-Box	NOSIP	IOH10172	-
ECS Complex	SPSB1	IOH10110	-
SCF Complex	FBXL18	IOH14000	+
ECS Complex	SOCS2	IOH13865	-
SCF Complex	FBXO31	IOH13801	-
U-Box	NOSIP	IOH14367	-
Others	CGRRF1	IOH14256	-
Cul3 Complex	KLHL20	IOH7296	-
Others	RNF24	IOH3774	-
Others	CCNB1IP1	IOH3409	-
Oncogenes&Tumor Supressor Genes	CDC20	IOH3839	-
SCF Complex	RBX1	IOH4015	-
Multi-Subunit RING-Finger Culins&Adaptors	RNF7	IOH7569	-
ECS Complex	CISH	IOH22653	-
Multi-Subunit RING-Finger Culins&Adaptors	TCEB2	IOH14150	-
Makorin	MKRN1	IOH14075	-
Multi-Subunit RING-Finger Culins&Adaptors	TCEB1	IOH21468	-
HECT	HECTD3	IOH14594	-
Mindbomb	MIB1	IOH12998	-
Cul3 Complex	ENC1	IOH3669	-
TRIM/RBCC	TRIM31	IOH10396	-
TRIM/RBCC	TRIM74	IOH21866	-
SCF Complex	FBXL5	IOH22444	-
TRAF	TRAF2	IOH21846	-
U-Box	WDSUB1	IOH22574	+
TRIM/RBCC	TRIM52	IOH7015	-
TRIM/RBCC	TRIM41	IOH14113	-
ECS Complex	ASB9	IOH11965	-
ECS Complex	ASB9	IOH3256	-
ECS Complex	SPSB2	IOH4981	-
HECT	WWP2	IOH4735	-
Oncogenes&Tumor Supressor Genes	CBLC	IOH22918	-
PDZRN	LNX1	IOH22717	-
TRIM/RBCC	TRIM44	IOH12577	-
Others	RNF10	IOH9787	-
UBL	PIAS2	IOH13849	-
HECT	UBE3C	IOH14050	-
Cul4 Complex	DDB2	IOH4740	-
TRIM/RBCC	RFPL3	IOH21504	-
SCF Complex	FBXO4	IOH26750	-
Polycomb	PCGF5	IOH27011	-
SCF Complex	FBXO25	IOH26678	-
Others	RNF168	IOH27564	-
Others	SYVN1	IOH21699	-
SCF Complex	FBXW5	IOH3242	-
VPS	VPS18	IOH13196	-
SCF Complex	FBXO21	IOH28769	-
ECS Complex	SOCS6	IOH11861	-
Others	ZER1	IOH29391	-
SCF Complex	FBXL4	IOH29000	+
Others	RNF26	IOH6846	-
ECS Complex	SOCS3	IOH29563	-
VPS	VPS41	IOH27643	-
CBL	CBLB	IOH27168	+
Others	TRAIP	IOH3484	+
Cul3 Complex	RHOBTB1	IOH27118	-
Cul3 Complex	RHOBTB3	IOH25836	-
HECT	UBE3C	IOH12763	-
Pelino	PELI1	IOH26519	+
SCF Complex	FBXL2	IOH27349	+
Others	RNF41	IOH21937	+
Cul4 Complex	CRBN	IOH23076	+
SCF Complex	FBXL14	IOH11609	-
Cul3 Complex	BTBD1	IOH21551	-
ECS Complex	ASB2	IOH21720	-
Others	RNF170	IOH21681	-
TRIM/RBCC	TRIM26	IOH21638	-
TRIM/RBCC	TRIM17	IOH21790	-
TRIM/RBCC	TRIM4	IOH14619	-
Others	RNF5	IOH3743	-
TRIM/RBCC	TRIM28	IOH5106	+
ECS Complex	SPSB4	IOH6956	-
TRIM/RBCC	TRIM8	IOH13368	-
TRIM/RBCC	RNF135	IOH6611	-
SCF Complex	FBXO33	IOH28939	-
ECV complex	CUL2	IOH13931	-
UBL	PIAS3	IOH4782	-
Praja	RNF126	IOH14599	-
SCF Complex	FBXO7	IOH12417	-
SCF Complex	FBXO3	IOH26934	-
UBR Box	UBR2	IOH40668	+
SCF Complex	FBXL20	IOH40622	+
TRAC-I	RNF166	IOH14416	-
MDM	MDM4	IOH40040	-
Deltex	DTX2	IOH25783	-
UBL	PIAS1	IOH38116	-
Others	WHSC1	IOH38113	+
SCF Complex	FBXO4	IOH42196	+
SCF Complex	FBXO21	IOH42260	+
Others	RNF152	IOH43310	-
ECV Complex	VHL	IOH43352	+
Oncogenes&Tumor Supressor Genes	BIRC7	IOH44697	+
BRCC Complex	RAD51	IOH41191	+
Multi-Subunit RING-Finger Culins&Adaptors	TCEB2	IOH42170	+
Others	RNF34	IOH41584	-
SCF Complex	FBXO25	IOH45912	-
TRIM/RBCC	TRIM63	IOH45956	-
SCF Complex	TSPAN17	IOH45925	-
TRIM/RBCC	MID1	IOH45487	-
ECS Complex	ASB3	IOH45865	-
Goliath	RNF13	IOH45765	-
SCF Complex	FBXO9	IOH45897	-
APC/C	ANAPC11	IOH45898	-
Cul3 Complex	KLHL9	IOH42535	+
SCF Complex	CUL1	IOH41991	-
BRE1	RNF20	IOH42829	-
SCF Complex	FBXO32	IOH41318	-
TRIM/RBCC	TRIM61	IOH43094	-
TRIM/RBCC	TRIM72	IOH23256	-
HECT	WWP1	IOH27251	++
Oncogenes&Tumor Supressor Genes	MDM2	IOH50109	-
Multi-Subunit RING-Finger Culins&Adaptors	RNF7	IOH50165	-
BRE1	RNF40	IOH6599	-
Others	MALT1	IOH23001	-
TRIM/RBCC	TRIM36	IOH57334	-
TRIM/RBCC	TRIM36	IOH57333	+
HECT	HERC3	IOH27251	-
Cul3 Complex	GAN	IOH25725	-
Praja	RNF126	IOH4042	-
Deltex	DTX1	IOH28067	-
Polycomb	PCGF3	IOH11623	-
Praja	PJA2	IOH22232	-
TRAF	TRAF5	IOH21612	-
APC/C	ANAPC2	IOH21911	-
SCF Complex	FBXL18	IOH9877	+
TRIM/RBCC	TRIM61	IOH53777	-
ECV complex	VHL	IOH29460	-
SCF Complex	FBXO9	IOH57881	+
Others	RNF121	IOH57484	-
TRAF	TRAF4	IOH29740	-
RBR	RNF14	IOH46388	+
Others	CGRRF1	IOH53926	-
Others	RNF8	IOH56905	-
Deltex	DTX2	IOH57012	-
U-Box	STUB1	IOH56981	++
Others	LRSAM1	IOH55653	+
ECS Complex	ASB9	IOH59409	-
TRIM/RBCC	TRIM27	IOH61477	-
SCF Complex	FBXW12	IOH63570	-
TRAC-I	RNF114	IOH10466	+
Praja	RNF115	IOH	-
Polycomb	RNF2	IOH12266	-
RBR	RNF216	IOH45500	-
Others	RNF25	RNF25	-
HECT	HECTD2	HECTD2	-
